# Supplementary figures and images for: Novel mixed-valence Cu compounds formed by Cuii dimers with double oximato bridges: in situ formation of anionic layer [Cu2(SCN)3]nn−
Source: Royal Society of Chemistry journal article supplement (doi:10.1039/c3dt51561c), 2013-01-01

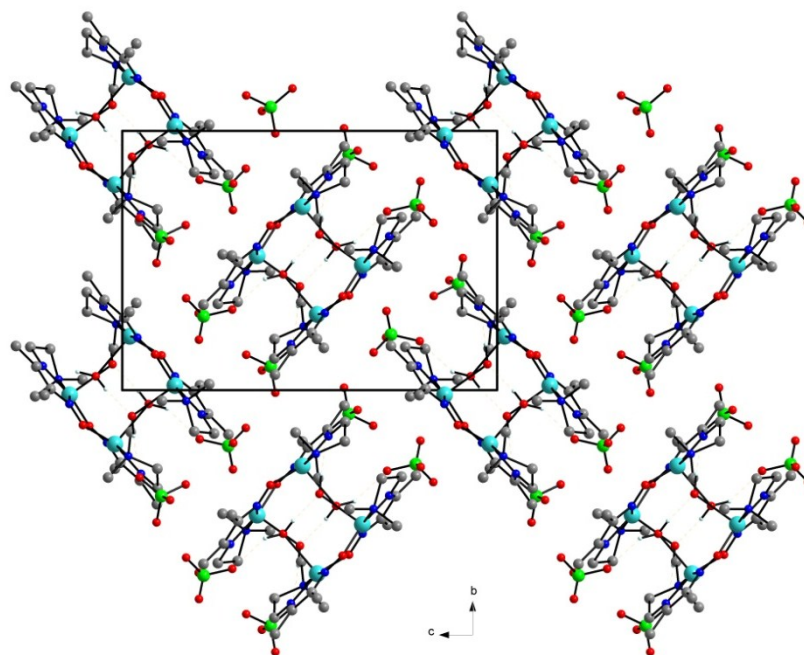

**Fig. S1**

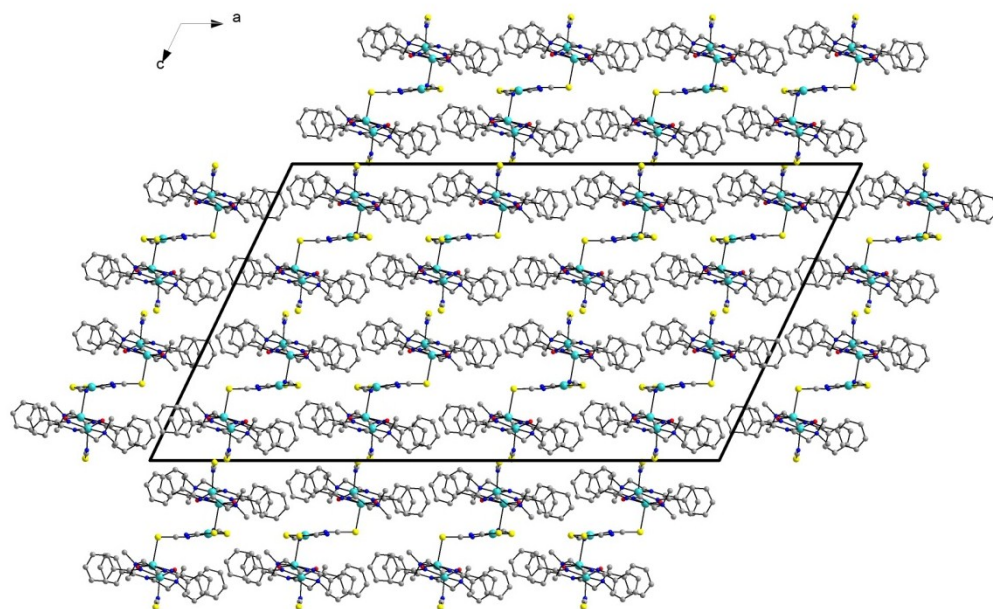

**Fig. S2**

Supplement: c3dt51561c.pdf [file c3dt51561c.pdf]
